# Supplementary material for: Partial absence of PD‐1 expression by tumor‐infiltrating EBV‐specific CD8+ T cells in EBV‐driven lymphoepithelioma‐like carcinoma
Source: PubMed Central journal article supplement (PMC7503213; doi:10.1002/cti2.1175), 2020-09-09
Supplement: CTI2-9-e1175-s001.pdf [file CTI2-9-e1175-s001.pdf]

**(a)**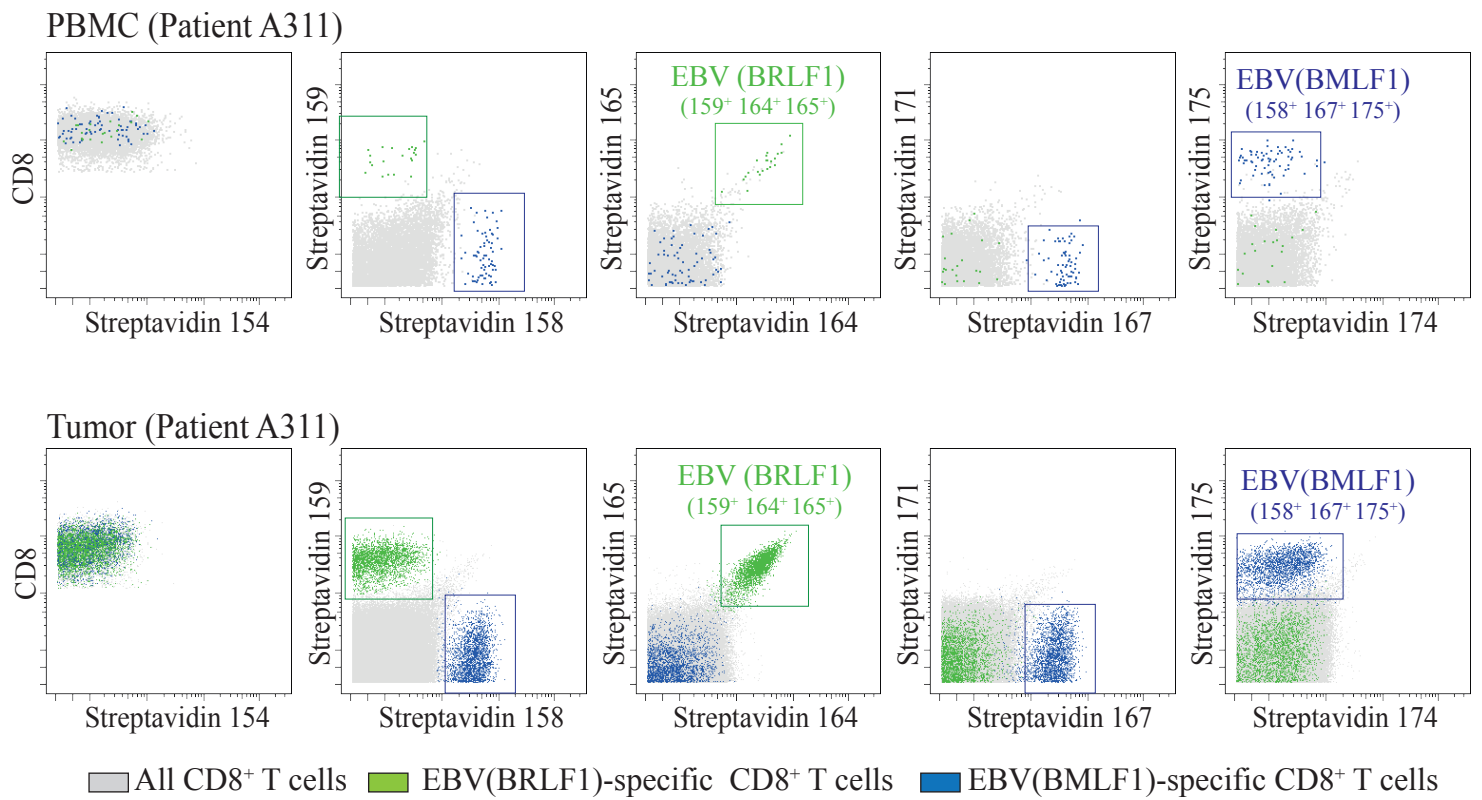**(b)**Gated on CD8<sup>+</sup> T cells (Mass-cytometry)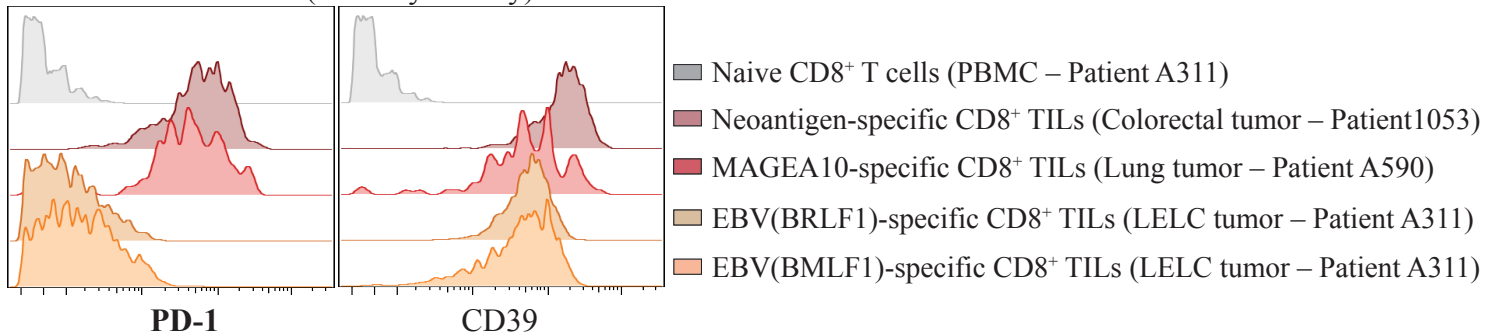

**Supplementary figure 1.** Identification and characterization of EBV-specific CD8<sup>+</sup> TILs in EBV-driven LELC tumor by mass cytometry. **(a)** Multiplex tetramer staining by mass cytometry. To investigate the antigen specificity of CD8<sup>+</sup> T cells in blood and tumor of LELC patient (Patient A311), we performed multiplex MHC class I tetramer staining as reported previously (see Methods). By using a three-metal coding scheme, we encoded up to 120 different tetramers specific for viral epitopes and tumor-associated antigens. EBV(BMLF1)-specific CD8<sup>+</sup> T cells were identified using HLA-A\*24:02 tetramer (DYNFVKQLF), EBV (BRLF1)-specific CD8<sup>+</sup> T cells were identified using HLA-A\*24:02 tetramer (TYPVLEEMF). **(b)** Expression of PD-1 and CD39 by EBV-, tumor associated antigen- and neoantigen-specific CD8<sup>+</sup> TILs in human cancer. Histogram representing PD-1 and CD39 expression by tumor-specific CD8<sup>+</sup> TILs identified by MHC class I tetramer. Naive CD8<sup>+</sup> T cells (CCR7<sup>+</sup> CD45RO<sup>-</sup>), Neoantigen-specific CD8<sup>+</sup> TILs were identified using HLA-A\*11:01 tetramer for mutAHR (GISQELPYK) (see Simoni *et al.* Nature 2018), tumor associated antigens MAGEA10-specific CD8<sup>+</sup> TILs were identified using HLA-A\*02:01 tetramer (GLYDGMEHL).
